24 **Abstract**

25 Overactivation of the Mitogen-activated protein kinase (MAPK) pathway is a critical driver  
26 of many human cancers. However, therapies targeting this pathway have proven effective  
27 in only a few cancers, as cancers inevitably develop resistance. Puzzling observations  
28 suggest that MAPK targeting fails in tumors due to early compensatory RAS  
29 overexpression, albeit by unexplained mechanisms. We identified a novel mechanism of  
30 drug tolerance to MEK inhibitors (MEKi) that involves Processing Bodies (PBs), a  
31 membraneless organelle (MLO). MEKi promoted translation of the oncogenes KRAS and  
32 NRAS, which in turn triggered BRAF phosphorylation. This overexpression, which  
33 occurred in the absence of neotranscription, depended on PB dissolution as the source of  
34 the *RAS* mRNA. Moreover, in response to MEKi removal, the process was dynamic as  
35 PBs rapidly reformed and reduced MAPK signaling. These results highlight a dynamic  
36 spatiotemporal negative feedback loop of MAPK signaling via *RAS* mRNA sequestration.  
37 Furthermore, we observed a phenotype with a low number of PBs along with strong KRAS  
38 and NRAS induction capacities. Overall, we describe a new intricate mechanism involving  
39 PBs in the translational regulation of essential cellular signaling pathways like MAPKs,  
40 paving the way for future therapies altering MLO and thereby improving targeted cancer  
41 therapies.

42 **Keywords**

43 RNA metabolism, RAS, KRAS, NRAS, MAPK, Liquid Liquid phase separation, DDX6,  
44 processing bodies, oncogene, MEKi.

## 45 **Background**

46 mRNAs are actively translated, repressed, stored, or degraded in response to  
47 environmental cues. These post-transcriptional pathways are critical for controlling cell  
48 fates that are altered under pathological conditions, such as cancer(1, 2). In this context,  
49 recent transcriptome-wide studies have shown that most RNAs have a restricted, dynamic  
50 and regulated subcellular localization. The key players in this process include two RNA  
51 clusters and their associated regulatory RNA-binding proteins (RBPs) known as  
52 constitutive processing bodies (PBs) and environmentally induced stress granules(3, 4).  
53 In contrast to organelles with a lipid bilayer membrane, membraneless structures are  
54 formed by a process known as liquid-liquid phase separation (LLPS), which confers a  
55 broad range of plasticity to these super-assemblies(5). Sequestration of mRNAs into  
56 these ribonucleoprotein granules is associated with translational repression, thus it  
57 uncouples mRNA expression from protein production and enables spatiotemporal control  
58 of gene expression(3). Moreover, PBs and stress granules act as reservoirs for silent  
59 mRNAs that can re-enter translation to adapt protein expression to the environment, and  
60 confer plasticity to the genetic program(3, 5–7). Although this post-transcriptional control  
61 is key to cellular adaptation to a volatile and stressful environment(1), few studies have  
62 investigated the role of PBs in the context of cancer progression and, in particular, as it  
63 relates to the emergence of drug-tolerant cells.

64 Mitogen-activated protein kinases (MAPKs) are ubiquitous signal transduction pathways  
65 that control cell fate by phosphorylating hundreds of substrates. The RAS-RAF-MEK-ERK  
66 pathway is altered in ~40% of all human cancers, mainly through RAS oncogenic  
67 mutations (32%) and their downstream effector BRAF (~10%). KRAS is mainly found  
68 mutated in pancreatic cancer (88%), lung cancer (30%) and colorectal adenocarcinomas

69 (50%). NRAS and BRAF are altered in melanoma (17% and 55%, respectively), thyroid  
70 carcinoma (19% and 55%, respectively), and lung cancer (1% and 5%, respectively) (8,  
71 9). Given the causative role of RAS-RAF-MEK-ERK pathway hyperactivation in  
72 tumorigenesis, several MEK, BRAF, and KRAS inhibitors (MEKi, BRAFi, and KRASi,  
73 respectively) have been developed in recent decades(10–12). Unfortunately, these  
74 treatments are inevitably associated with drug tolerance, acquired resistance and tumor  
75 recurrence(10, 13).

76 Although some resistance is directly attributable to the acquisition of somatic mutations,  
77 early drug resistance arose from plastic drug-tolerant or persister cells. Among these non-  
78 genetic early resistance events, upregulation of KRAS and NRAS proteins was suggested  
79 as a possible contributor in response to BRAFi or MEKi targeting downstream signalling  
80 pathway (14, 15), while the underlying mechanism remains unknown. Combining genetic  
81 and pharmacological approaches, we demonstrate that PBs are associated with drug  
82 tolerance through a DDX6-dependent negative feedback loop that fine-tunes the  
83 expression of KRAS and NRAS by controlling mRNA translation.

84

## 85 **Material and methods**

### 86 **Cell culture.**

87 The A549, H1650, Mel501, BT549 were cultured according to the recommendations of  
88 the ATCC. A549 (human lung adenocarcinoma epithelial cell line, ATCC, number CCL-  
89 185) and Mel-501(melanoma epithelial cell line), were grown in Dulbecco's Modified Eagle  
90 Medium (DMEM) supplemented with 10% fetal bovine serum (FBS). BT549 (Breast  
91 epithelial cell line, ATCC, number HTB-122) was grown in DMEM supplemented with 10%  
92 FBS and non-essential amino-acid (Thermofischer). H1650 (human lung adenocarcinoma  
93 epithelial cell line, ATCC, number CRL-5908) was grown in Roswell Park Memorial  
94 Institute (RPMI)-1640 medium supplemented with 10% FBS and 1mM sodium pyruvate.  
95 All the cells were maintained at 37°C in a 5% CO<sub>2</sub> in a humidified incubator. All cells were  
96 maintained no more than one month and were identified using STR profile (Eurofins  
97 Genomics). For proliferation assay, 10 000 cells were seeded in six-well plates in  
98 triplicates and cells numbers were evaluated every day for 5 days using a Coulter counter  
99 (Villepinte, FRANCE).

100

### 101 **DDX6 GFP stable cell lines.**

102 The pPRIPu GFP-DDX6 plasmid used in this study were constructed as follows:

103 The pPRIPu CrUCCI vector(16) (kind gift of Dr F. Delaunay) was amplified with primer  
104 adaptors for AgeI and BamH1 restriction sites. pEGFP-C1\_p54cp plasmids (kind gift of  
105 Drs D. Weil and M. Kress) were digested by AgeI and BamH1, and the respective resulting  
106 fragment was inserted in pPRIPU. The integrity of the entire sequence was confirmed by  
107 sequencing analysis. Briefly, replication-defective, self-inactivating retroviral constructs  
108 were used to establish stable A549 cell lines. Selection was performed with puromycin

109 (10µg/ml). Cells were then sorted as a polyclonal population and used in subsequent  
110 experiments.

111  
112 **siRNA transient transfection.**  
113 Cells were plated at 200 000 cells/well in 6-well plates. After 24h, cells were transfected  
114 with negative Control siRNA (Silencer Pre-designed small interfering RNA) or with *DDX6*,  
115 *KRAS* or *NRAS* siRNA using JetPrime (PolyPlus) according to the manufacturer's  
116 instructions as previously described(17). 48h after transfection, cells were lysed for RNA  
117 or protein analysis as described below.

118  
119 **Immunoblotting.**  
120 Immunoblotting was performed as described previously(17). Proteins were extracted from  
121 cells using Laemmli lysis buffer (12.5mM Na<sub>2</sub>HPO<sub>4</sub>, 15% glycerol, 3% sodium dodecyl  
122 sulfate [SDS]). The protein concentration was measured with the DC Protein Assay (BIO-  
123 RAD) and 30µg to 50µg of total proteins were loaded onto 7.5% or 12% SDS-  
124 polyacrylamide gels for electrophoresis and transferred onto polyvinylidene difluoride  
125 membranes (Millipore). After 1h of blocking with 5% bovine serum albumin or non-fat milk  
126 prepared in Phosphate-Buffered Saline (PBS)-0.1% Tween-20 buffer, the blots were  
127 incubated overnight at 4°C with antibodies (supp table). After 1h of incubation with a  
128 horseradish peroxidase-conjugated secondary antibody (1:3,000, Promega), protein  
129 bands were visualized using an enhanced chemiluminescence detection kit (Millipore) and  
130 and the Syngene Pxi4 imaging system (Ozyme). Western blot quantification was  
131 performed by Fiji freeware on unsaturated captured images.

132

133 **Isolation of RNA and quantitative real-time RT-PCR analysis.**

134 Total RNA extraction was performed using TRI-reagent (Sigma-Aldrich), followed by  
135 column based extraction as described previously(18). The RNA concentration was  
136 measured by NanoDrop 2000 (Thermo Fisher Scientific) and the integrity of RNA was  
137 analyzed by Bioanalyser (Agilent). For mRNA, the cDNA strand was synthesized from  
138 500ng of total RNA. Quantification of *KRAS* and *NRAS* and *RPLP0* genes was measured  
139 by power-Sybr-green assays with the StepOne™ Real-time PCR System. The qPCR  
140 primers are referenced in the supplementary table.

141

142 **Immunofluorescence and confocal microscopy.**

143 Cells were grown to confluence and fixed in 4% paraformaldehyde for 20min. After  
144 fixation, cells were permeabilized with a solution containing 0.3% Triton X-100 for 5min.  
145 Then, cells were incubated with primary antibodies (supp table) overnight at 4°C in  
146 humidified chambers in a solution containing 0.03% Triton X-100, 0.2% gelatin and 1%  
147 BSA. Cells were washed and incubated with Alexa Fluor-conjugated secondary antibodies  
148 (1:500; Molecular Probes) for 1h at room temperature and mounted in ProLong Diamond  
149 Reagent with DAPI (Molecular Probes). Images were captured on a Zeiss LSM880  
150 confocal microscope and analyzed with Fiji freeware.

151

152 **Polysome gradient.**

153 Subcellular fractionation. All steps of the subcellular fractionation were performed at 4°C.  
154 Cells (60-80x10<sup>6</sup> cells) with or without treatment were trypsinized and washed twice with  
155 15 ml of ice-cold PBS by centrifugation. Cell pellets were resuspended in 1 ml of hypotonic  
156 Buffer composed of 40mM Tris-HCl, pH 7.5, 10mM KCl, 3mM MgCl<sub>2</sub> and 0.2% Nonidet

157 P-40 supplemented with 1mM DTT and 0,5mM phenylmethylsulfonyl fluoride (PMSF).  
158 After incubation for 15min on ice, cells were lysed in a Dounce homogenizer with B pestle.  
159 The efficiency of cell lysis in keeping the nuclei intact was verified by staining with trypan  
160 blue under an optical microscope. The cell lysates were spun at 900g for 5min to obtain  
161 the cytoplasm (supernatant) and nuclei (pellet) fractions.  
162 Sucrose gradient fractionation. About 10 OD 260nm of cytosolic extracts were loaded to  
163 the top of a linear sucrose gradient (10–50%) made of Sucrose Gradient Buffer (25mM  
164 Tris-HCl, pH 7.5, 150mM NaCl, 12mM MgCl<sub>2</sub>, 1mM DTT) in Ultra-Clear ultracentrifugation  
165 tubes (Beckman Coulter). The cytosolic fraction samples were fractionated by  
166 ultracentrifugation for 2h 45min at 39,000rpm and at 4°C in a Beckman Optima  
167 ultracentrifuge with a SW41 Ti swinging bucket rotor at the following settings: acceleration  
168 9 and deceleration 4. Following ultracentrifugation, the sucrose gradients were  
169 fractionated using a Foxy JR fraction collector and monitored using a UV light (254-nm  
170 wavelength) absorbance detector (Teledyne ISCO, UA-6), to obtain 12 to 14 fractions.  
171 After addition of 0,5mM CaCl<sub>2</sub> and 0,2% SDS, the collected fractions were treated with  
172 proteinase K (50mg/ml, Sigma) for 30min at 40°C. Then, 10pg of an RNA spike-in was  
173 added to each fraction to serve as an internal calibrator of RNA extraction and detection.  
174 For this, we used an in vitro transcribed RNA that encodes the spike protein of SARS-  
175 CoV-2.  
176 Total RNA was extracted by vigorous shaking with an equal volume of Tris pH 8,0  
177 saturated phenol, chloroform, and isoamyl alcohol mixture (25:24:1, v/v/v) (Sigma-  
178 Aldrich), and phase separation was performed by centrifugation at 12,000g for 15min at  
179 4°C. The upper aqueous phase was washed once with an equal volume of  
180 chloroform:isoamyl alcohol (24:1, v/v) (Sigma-Aldrich) by vigorous shaking and



181 centrifugation at 12,000g for 15min at 4°C. The aqueous phase was transferred to a fresh  
182 tube and the RNA was precipitated overnight at -20°C by mixing with an equal volume of  
183 isopropanol, 2ml of glycoblue™ coprecipitant (Thermo Fisher Scientific) and 1/10  
184 volume of 3M Na acetate pH 5.2. RNA was pelleted by centrifugation at 12,000g for 15min  
185 at 4°C.

186

### 187 **Statistical analysis.**

188 Quantitative data were described and presented graphically as medians and interquartiles  
189 or means and standard deviations. The distribution normality was tested with the Shapiro's  
190 test and homoscedasticity with a Bartlett's test. For two categories, statistical comparisons  
191 were performed using the Student's t-test or the Mann–Whitney's test. All statistical  
192 analyses were performed by the biostatistician using R.3.2.2 software and the Prism8.0.2  
193 program from GraphPad software. Tests of significance were two-tailed and considered  
194 significant with an alpha level of  $p < 0.05$ . (graphically: \* for  $p < 0.05$ , \*\* for  $p < 0.01$ , \*\*\* for  
195  $p < 0.005$ ).

196

197

198 **Results**

199 **MEKi response promotes KRAS and NRAS translation.**

200 First, we confirmed the accumulation of NRAS and KRAS protein in response to MEKi,  
201 PD184352 (CI-1040), and trametinib in four different cell lines (A549, H1650, Mel501,  
202 BT549) regardless of the cancer type (lung, breast, or melanoma) and oncogenic drivers  
203 (KRASG12S, EGFR, BRAFV600E and PTEN, respectively) (Fig. 1A-C). To analyze  
204 whether both KRAS and NRAS proteins can activate downstream BRAF phosphorylation  
205 under these conditions (Fig. 1D-E), we used siKRAS and siNRAS either alone or in  
206 combination. Interestingly, we demonstrated that both KRAS or NRAS maintained BRAF  
207 phosphorylation in the presence of PD184352. Complete inhibition of BRAF  
208 phosphorylation was almost only achieved when both siRNAs were combined (Fig. 1D-  
209 E). Altogether, these results highlight that increasing protein expression of KRAS or NRAS  
210 was sufficient to induce phosphorylation of BRAF after MEK inhibition.

211 In this context, we investigated the possible causes for this increase in KRAS and NRAS  
212 protein expression. At the transcriptional level, we showed that the mRNA levels of *KRAS*  
213 and *NRAS* were stable upon PD184352 treatment (Fig. 2A-B). Moreover, the PD184352  
214 increase in KRAS and NRAS protein levels was maintained in the presence of the  
215 transcriptional inhibitor actinomycin D (Fig. 2C, suppl Fig. 1A). Altogether, these results  
216 argue for a posttranscriptional mechanism.

217 Using a ribosome profiling experiment, we showed that the mRNAs of *KRAS* and *NRAS*  
218 shifted from monosomes to heavy polysome fractions in the presence of PD184352 (Fig.  
219 2D). To confirm an increase in translation, we treated A549 cells with the proteasome  
220 inhibitor MG132 to accumulate proteins by blocking their degradation. In cells treated with  
221 PD184352 and MG132, accumulation of KRAS was greater than with MG132 alone,

222 confirming enhanced translation of *KRAS* mRNA in the presence of PD184352 (suppl.  
223 Fig. 1B-C). We conclude from these results that the rapid PD184352-induced *NRAS* and  
224 *KRAS* overexpression is due to an increase in translation rather than transcription.

225

### 226 **MEK inhibition promotes PB dissolution.**

227 Since it has been reported that *KRAS* and *NRAS* mRNAs are accumulated in PBs (3, 19),  
228 we hypothesized that protein overexpression of *KRAS* and *NRAS* is associated with the  
229 fact that the *KRAS* and *NRAS* pool of mRNA previously-stored in PBs has become  
230 available for translation. In this context, we analyzed the number and size of cellular PBs  
231 in different cancer cell lines. Strikingly, we observed a significant decrease in the size and  
232 number of PBs in response to PD184352 and trametinib in all cell types examined (Fig.  
233 3A-F, Suppl. Fig. 2). This MEKi-induced decrease was most significant after 8h, showing  
234 a PB dissolution kinetics correlating with the time course of *KRAS* and *NRAS*  
235 overexpression. At this time point, MEKi had no effect on cell cycle progression, ruling out  
236 the possibility that PB dissolution was a secondary effect of cell cycle arrest (Fig. 3G-I,  
237 Suppl. Fig. 2). This overall decrease in the number of PB was not associated with lower  
238 *DDX6* or *LSM14A* levels, two proteins required for PB formation (Fig. 3I), nor with the  
239 induction of stress granules (Suppl. Fig. 3).

240 Next, we analyzed the dynamics of the formation of PBs and the expression of *KRAS*. To  
241 this end, after treatment with PD184352 for 24h to dissolve PBs and induce  
242 overexpression of *KRAS* and *NRAS*, MEKi were removed, and cells were harvested at  
243 different time points (Fig. 4A). After PD184352 washout, strong activation of ERK was  
244 observed that persisted for 4h, along with stable expression of *KRAS* and *NRAS* and  
245 phosphorylation of *BRAF* (Fig. 4B, suppl Fig. 4). From 8 to 24h, a gradual decrease in the

246 expression of KRAS and NRAS along with a decrease in BRAF phosphorylation was  
247 inversely correlated with an increasing number of PBs over time (Fig. 4B-D, suppl Fig. 4),  
248 indicating translational arrest. After removal of the drug, a growth rate comparable to that  
249 of untreated cells was re-established, demonstrating the rapid adaptability of cancer cells  
250 (Fig. 4E). Thus, our results provide evidence of two things. Firstly, they show that the high  
251 plasticity orchestrated by PBs helps to adjust the translational rate RAS through negative  
252 feedback loops. Secondly, they demonstrate that these KRAS and NRAS overexpression  
253 can trigger BRAF phosphorylation in the presence of MEKi. This PBs/RAS balance  
254 differentiate drug tolerance when compared with growth condition of cancer cells.  
255 Next, we tested whether PB dissolution and the associated of KRAS and NRAS  
256 overexpression could be corrected prolonged drug treatment. In drug-tolerant A549 cells,  
257 after tumor cells were treated with PD184352 at a dose of 2.5 $\mu$ M for 8 weeks, the drug  
258 was washed out and the drug-tolerant cells were then cultured for an additional 24h in the  
259 presence or absence of PD184352 at indicated concentrations. Figure 5 shows that  
260 activation of ERK after MEKi washout was identical to that observed in normal cells for  
261 24h. Strikingly, the number and size of PBs were significantly lower than in the control  
262 condition, even in cells treated with a single dose of PD184352 (Fig. 5, Suppl. Fig. 5).  
263 Interestingly, at 10 $\mu$ M PD184352, the expression of KRAS was strongly induced in the  
264 resistant cells, along with a significant decrease in PBs (Fig.5, Suppl Fig.5). This  
265 overexpression was strong enough to maintain residual phosphorylation of ERK and  
266 overcame MEKi inhibition. As a sign of non-genetic resistance, these drug-tolerant cells  
267 restored a complete growth phenotype 5 days after MEKi removal (Suppl Fig. 5).  
268 Collectively, these results suggest that MEKi-induced PB dissolution is an early event in

269 drug-tolerant cells and that this mechanism is established over time as a strategy to  
270 maintain KRAS and NRAS oncogenes expression to survive.

271

272 **Essential PB components control KRAS and NRAS expression.**

273 To test for a causal role between the translational repression activities of PB components  
274 and KRAS and NRAS expression, we modulated the level of the RNA helicase DDX6 and  
275 essential PB component. Overexpression of GFP-tagged DDX6 increased the size and  
276 number of PBs. This significant increase in PBs correlated with decreased KRAS and  
277 NRAS expression (Fig. 6A-C, Suppl. Fig. 6). Notably, under these conditions, mRNA  
278 levels of *KRAS* and *NRAS* remained unchanged, indicating mRNA storage (Fig. 6D-E).  
279 Conversely, silencing of DDX6 resulted in complete dissolution of PBs, which was  
280 sufficient to trigger overexpression of KRAS and NRAS alone (Fig. 6F-G). Overall, these  
281 results demonstrated that PBs components play a critical role in mediating MEKi-induced  
282 RAS overexpression and the development of MEKi drug tolerance.

## 283 **Discussion**

284 For many decades, studies have pointed to genetic mutations as a central mechanism for  
285 acquiring resistance to targeted therapies(20). However, there is a growing body of  
286 evidence that challenges this consensus and suggests that non-genetic heterogeneity and  
287 cell plasticity are actively involved in drug tolerance(21–23). Recently, new profiling  
288 techniques such as FATE -seq have been performed to unravel the non-genetic  
289 mechanisms of resistance(24). However, it is clear that genetic and non-genetic  
290 mechanisms of resistance or drug tolerance are often interrelated and not mutually  
291 exclusive(23, 25). Non-genetic resistance is due to the intrinsic plasticity of tumor cells,  
292 i.e., the ability to undergo transcriptional and epigenetic reprogramming in response to  
293 environmental challenges or to therapy. In this context, current therapeutic options for  
294 BRAFV600E/K patients include therapies targeting the MAPK pathway, which show  
295 remarkable efficacy in the first months of treatment(13). However, most patients treated  
296 with a combination of BRAF inhibitor (BRAFi) and MEK inhibitor (MEKi) inevitably relapse  
297 within a few months(13, 26). This relapse is associated with the presence of so-called  
298 persister, cancer stem, drug tolerant or resistant cells as reported in several studies, that  
299 harbor either a genetic or non-genetic program for survival(22, 27).

300 Here, we focused on the early events of drug tolerance. We demonstrated that within 8h,  
301 cells were able to establish overexpression of KRAS and NRAS that was independent of  
302 de novo transcription and inhibition of protein degradation. Interestingly, we observed that  
303 this overexpression persisted for weeks and eventually overcame MAPK inhibition. Drug-  
304 tolerant cells cultured in the presence of MEKi for a prolonged period exhibited a persistent  
305 decrease in PBs even 24h after treatment discontinuation, whereas restoration of PBs to  
306 normal levels occurred in drug-tolerant cells after a brief exposure to MEKi. Continuous

307 versus intermittent BRAF and MEK inhibition in melanoma patients with BRAF V600E/K  
308 mutations was tested in a randomized, open-label phase 2 clinical trial  
309 (NCT02196181)(26). In this study, continuous administration resulted in a statistically  
310 significant improvement in progression-free survival after randomization compared to  
311 intermittent administration, suggesting that drug-tolerant cancer cells with increased  
312 plasticity may grow faster than long-term resistant cells after intermittent administration.  
313 Furthermore, by demonstrating that both KRAS and NRAS are equally important for  
314 maintaining BRAF activity, we have revealed novel ways to focus to replace MAPKi  
315 treatments, such as the development of resistance to KRAS G12C inhibitors in patients  
316 harboring either KRAS or NRAS mutations(11).

317 We have also shown that both PD184352 and trametinib can resolve MEKi. The role of  
318 the MAPK pathway is consistent with a previous study showing that MAPK3 (ERK1) was  
319 associated with PBs dissolution in the absence of a DDX6 decrease in the siRNA  
320 screening of 1,354 human genes(28). Our work highlights the fact that the activity rather  
321 than the level of ERK is critical for PBs dissolution. However, since ERKs can  
322 phosphorylate more than 200 intracellular targets, further studies are needed to determine  
323 whether the formation of PBs depends on the activity of ERK, either through direct  
324 targeting of PB components or indirectly through a partner of PBs.

325 Finally, we have shown that expression of the PB component DDX6, a helicase associated  
326 with miRNA-dependent repression of translation and PB storage, controls KRAS and  
327 NRAS translation. These results are consistent with previous studies showing  
328 accumulation of *KRAS* and *NRAS* mRNAs in PBs(3, 19), which likely depend on multiple  
329 *let-7* miRNA response elements on both 3'UTR(29). Moreover, several features of *KRAS*  
330 and *NRAS* mRNAs (i.e., the length of 5.3kb and 4.3kb, respectively, and the low GC

331 content of their coding region or 3'UTR mRNA, 38% and 44%, respectively) may also  
332 contribute to their targeting of PBs(30). Previous studies have shown that KRAS is poorly  
333 translated compared to HRAS due to its enrichment in genomically underrepresented or  
334 rare codons(31, 32). In our study, we observed that either MEKi-induced dissolution or  
335 downregulation of DDX6 were associated with strong translation of *KRAS* and *NRAS*  
336 mRNAs and overexpression of the corresponding proteins. These results suggest that  
337 rare codons, often associated with the presence of an AU-rich third codon, favor the  
338 recruitment of mRNA repressors due to slow translational processing, which, however,  
339 can be overcome under certain conditions.

340 Overall, these results reveal a novel negative feedback loop involving PBs in the  
341 translational control of *KRAS* and *NRAS* mRNAs (Suppl Fig. 7). The type of regulation of  
342 the MAPK pathway that we have described here should pave the way for therapies that  
343 avert early resistance and achieve drug-tolerant cells before relapse.

344



345 **Ethics approval and consent to participate**

346 Not applicable

347

348 **Consent for publication**

349 Not applicable

350

351 **Availability of data and materials**

352 Database sharing does not apply to this article as no RNA datasets were generated or  
353 analyzed during the current study. Additional files containing raw data experiments and  
354 links to <https://idr.openmicroscopy.org/> for confocal microscopy collection of images will  
355 be provided for final revision and publication.

356

357 **Competing interests**

358 The authors declare no financial relationships with any organizations that might have an  
359 interest in the submitted work over the previous three years and no other relationships or  
360 activities that could appear to have influenced the submitted work.

361

362 **Funding**

363 Authors acknowledge funding from the French Government (Agence Nationale de  
364 Recherche, ANR) through the 'Investments for the Future' LABEX SIGNALIFE (ANR-11-  
365 LABX-0028-01 and IDEX UCAJedi ANR-15-IDEX-01), ANR FibromiR N° ANR-18-CE92-  
366 0009-01; "Fondation ARC pour la Recherche contre le Cancer" (Canc'air  
367 GENExposomics and PJA-20191209562), Cancerpole PACA; DREAL PACA, ARS  
368 PACA, Région Sud, Institut National du Cancer, INSERM cancer; ITMO Cancer 2014-

369 2019 (14APS001MCSR and 18CN045). The authors acknowledge using the IRCAN's  
370 Flow Cytometry Facility (CytoMed) and the IRCAN's Molecular and Cellular Core Imaging  
371 (PICMI) Facility supported by le FEDER, Ministère de l'Enseignement Supérieur, Conseil  
372 Régional Provence Alpes-Côte d'Azur, Conseil Départemental 06, ITMO Cancer Aviesan  
373 (plan cancer), Gis Ibisa, Cancéropole PACA, CNRS and Inserm

374

### 375 **Authors' contributions**

376 OVC and PB supervised and wrote the manuscript. OVC, VJN, TR, RR, CL JF, KJ, MAD,  
377 CV, TJ, and BR contributed substantially to define the concept and design the study; they  
378 acquired, analyzed, and interpreted of the data. JR, AH, BMa, BMo, and PH substantively  
379 revised the manuscript. AH, BMa, BMo, PH, and PB supported the work through fundings.  
380 All authors read and approved the final manuscript.

### 381 **Acknowledgments**

382 Our thanks to the UCA Office of International Scientific Visibility for comments on the  
383 English version of the manuscript. Authors would like to thank Dr Julien Cherfils and  
384 Ludovic Cervera (Cytomed facility), Frederic Brau (IMPC) and Nadir Djerbi (PICMI) for  
385 technical help, Dr Dominique WEIL, Dr Michel Kress, and Dr Franck Delaunay for kindly  
386 providing plasmids.

387

### 388 **Abbreviations**

389 MAPK: Mitogen-activated protein kinase

390 MEKi : MEK inhibitors

391 PBs: Processing Bodies

392 RBP: RNA binding proteins

- 393 LLPS: Liquid Liquid phase separation
- 394 DMEM: Dulbecco's Modified Eagle Medium
- 395 FBS: fetal bovine serum
- 396 RPMI: Roswell Park Memorial Institute
- 397 siRNA: small interfering RNA
- 398 SDS: Sodium Dodecyl sulfate
- 399 PBS: Phosphate-Buffered Saline
- 400 BSA: Bovine serum albumin
- 401 PD18: PD184352
- 402 LUAD: Lung Adenocarcinoma
- 403 SKCM: Skin Cutaneous Melanoma
- 404 BRCA: Breast Cancer
- 405 ActD: Actinomycin D
- 406 Tram: Trametinib
- 407 .

408 **References**

- 409 1. Anderson,P., Kedersha,N. and Ivanov,P. (2015) Stress granules, P-bodies and cancer.  
410 *Biochimica et Biophysica Acta (BBA) - Gene Regulatory Mechanisms*, **1849**, 861–  
411 870.
- 412 2. Masuda,K. and Kuwano,Y. (2019) Diverse roles of RNA-binding proteins in cancer traits  
413 and their implications in gastrointestinal cancers. *Wiley Interdisciplinary Reviews:*  
414 *RNA*, **10**, 1–18.
- 415 3. Hubstenberger,A., Courel,M., Bénard,M., Souquere,S., Ernoult-Lange,M., Chouaib,R.,  
416 Yi,Z., Morlot,J.B., Munier,A., Fradet,M., *et al.* (2017) P-Body Purification Reveals the  
417 Condensation of Repressed mRNA Regulons. *Molecular Cell*, **68**, 144-157.e5.
- 418 4. Khong,A., Matheny,T., Jain,S., Mitchell,S.F., Wheeler,J.R. and Parker,R. (2017) The  
419 Stress Granule Transcriptome Reveals Principles of mRNA Accumulation in Stress  
420 Granules. *Molecular Cell*, **68**, 808-820.e5.
- 421 5. Banani,S.F., Lee,H.O., Hyman,A.A. and Rosen,M.K. (2017) Biomolecular condensates:  
422 Organizers of cellular biochemistry. *Nature Reviews Molecular Cell Biology*, **18**, 285–  
423 298.
- 424 6. Liu,J., Valencia-Sanchez,M.A., Hannon,G.J. and Parker,R. (2005) MicroRNA-  
425 dependent localization of targeted mRNAs to mammalian P-bodies. *Nature cell*  
426 *biology*, **7**, 719–23.
- 427 7. Pitchiaya,S., Mourao,M.D.A.A., Jaliha,A.P., Xiao,L., Jiang,X., Chinnaiyan,A.M.,  
428 Schnell,S. and Walter,N.G. (2019) Dynamic Recruitment of Single RNAs to  
429 Processing Bodies Depends on RNA Functionality. *Molecular Cell*, **74**, 1–13.
- 430 8. Prior,I.A., Hood,F.E. and Hartley,J.L. (2020) The frequency of ras mutations in cancer.  
431 *Cancer Research*, **80**, 2669–2974.

- 432 9. Anguera,G. and Majem,M. (2018) BRAF inhibitors in metastatic non-small cell lung  
433 cancer. *Journal of Thoracic Disease*, **10**, 589–592.
- 434 10. Awad,M.M., Liu,S., Rybkin,I.I., Arbour,K.C., Dilly,J., Zhu,V.W., Johnson,M.L.,  
435 Heist,R.S., Patil,T., Riely,G.J., *et al.* (2021) Acquired Resistance to KRAS G12C  
436 Inhibition in Cancer . *New England Journal of Medicine*, **384**, 2382–2393.
- 437 11. Tanaka,N., Lin,J.J., Li,C., Ryan,M.B., Zhang,J., Kiedrowski,L.A., Michel,A.G.,  
438 Syed,M.U., Fella,K.A., Sakhi,M., *et al.* (2021) Clinical Acquired Resistance to KRAS  
439 G12C Inhibition through a Novel KRAS Switch-II Pocket Mutation and Polyclonal  
440 Alterations Converging on RAS–MAPK Reactivation . *Cancer Discovery*,  
441 10.1158/2159-8290.cd-21-0365.
- 442 12. Smith,L.K., Sheppard,K.E. and McArthur,G.A. (2021) Is resistance to targeted therapy  
443 in cancer inevitable? *Cancer Cell*, **39**, 1047–1049.
- 444 13. Aldea,M., Andre,F., Marabelle,A., Dogan,S., Barlesi,F. and Soria,J.C. (2021)  
445 Overcoming resistance to tumor-targeted and immune-targeted therapies. *Cancer*  
446 *Discovery*, **11**, 874–899.
- 447 14. Wang,Y., Van Becelaere,K., Jiang,P., Przybranowski,S., Omer,C. and Sebolt-  
448 Leopold,J. (2005) A role for K-ras in conferring resistance to the MEK inhibitor, CI-  
449 1040. *Neoplasia*, **7**, 336–347.
- 450 15. Ambrosini,G., Khanin,R., Carvajal,R.D. and Schwartz,G.K. (2014) Overexpression of  
451 DDX43 mediates MEK inhibitor resistance through RAS upregulation in uveal  
452 melanoma cells. *Molecular Cancer Therapeutics*, **13**, 2073–2080.
- 453 16. Feillet,C., Krusche,P., Tamanini,F., Janssens,R.C., Downey,M.J., Martin,P.,  
454 Teboul,M., Saito,S., Lévi,F.A., Bretschneider,T., *et al.* (2014) Phase locking and  
455 multiple oscillating attractors for the coupled mammalian clock and cell cycle.

- 456 *Proceedings of the National Academy of Sciences of the United States of America*,  
457 **111**, 9828–9833.
- 458 17. Zangari,J., Ilie,M., Rouaud,F., Signetti,L., Ohanna,M., Didier,R., Roméo,B.,  
459 Goldoni,D., Nottet,N., Staedel,C., *et al.* (2016) Rapid decay of engulfed extracellular  
460 miRNA by XRN1 exonuclease promotes transient epithelial-mesenchymal transition.  
461 *Nucleic acids research*, **45**, 4131–4141.
- 462 18. Lassalle,S., Zangari,J., Popa,A., Ilie,M., Hofman,V., Long,E., Patey,M., Tissier,F.,  
463 Belléannée,G., Trouette,H., *et al.* (2016) MicroRNA-375/SEC23A as biomarkers of  
464 the *in vitro* efficacy of vandetanib. *Oncotarget*, **7**.
- 465 19. Pillai,R.S., Bhattacharyya,S.N., Artus,C.G., Zoller,T., Cougot,N., Basyuk,E.,  
466 Bertrand,E. and Filipowicz,W. (2005) Inhibition of translational initiation by let-7  
467 microRNA in human cells. *Science*, **309**, 1573–1576.
- 468 20. Chen,Z., Fillmore,C.M., Hammerman,P.S., Kim,C.F. and Wong,K.-K. (2014) Non-  
469 small-cell lung cancers: a heterogeneous set of diseases. *Nature Reviews Cancer*,  
470 **14**, 535–546.
- 471 21. De Conti,G., Dias,M.H. and Bernards,R. (2021) Fighting drug resistance through the  
472 targeting of drug-tolerant persister cells. *Cancers*, **13**, 1–15.
- 473 22. Marin-Bejar,O., Rogiers,A., Dewaele,M., Femel,J., Karras,P., Pozniak,J., Bervoets,G.,  
474 Van Raemdonck,N., Pedri,D., Swings,T., *et al.* (2021) Evolutionary predictability of  
475 genetic versus nongenetic resistance to anticancer drugs in melanoma. *Cancer Cell*,  
476 **39**, 1135-1149.e8.
- 477 23. Marine,J.C., Dawson,S.J. and Dawson,M.A. (2020) Non-genetic mechanisms of  
478 therapeutic resistance in cancer. *Nature Reviews Cancer*, **20**, 743–756.
- 479 24. Meyer,M., Paquet,A., Arguel,M.-J., Peyre,L., Gomes-Pereira,L.C., Lebrigand,K.,

- 480 Mograbi,B., Brest,P., Waldmann,R., Barbry,P., *et al.* (2020) Profiling the Non-genetic  
481 Origins of Cancer Drug Resistance with a Single-Cell Functional Genomics Approach  
482 Using Predictive Cell Dynamics. *Cell Systems*, **11**, 367-374.e5.
- 483 25. Vendramin,R., Litchfield,K. and Swanton,C. (2021) Cancer evolution: Darwin and  
484 beyond. *The EMBO Journal*, **40**, 1–20.
- 485 26. Algazi,A.P., Othus,M., Daud,A.I., Lo,R.S., Mehnert,J.M., Truong,T.G., Conry,R.,  
486 Kendra,K., Doolittle,G.C., Clark,J.I., *et al.* (2020) Continuous versus intermittent  
487 BRAF and MEK inhibition in patients with BRAF-mutated melanoma: a randomized  
488 phase 2 trial. *Nature Medicine*, **26**, 1564–1568.
- 489 27. Oren,Y., Tsabar,M., Cuoco,M.S., Amir-Zilberstein,L., Cabanos,H.F., Hütter,J.C.,  
490 Hu,B., Thakore,P.I., Tabaka,M., Fulco,C.P., *et al.* (2021) Cycling cancer persister  
491 cells arise from lineages with distinct programs. *Nature*, **596**, 576–582.
- 492 28. Berchtold,D., Battich,N. and Pelkmans,L. (2018) A Systems-Level Study Reveals  
493 Regulators of Membrane-less Organelles in Human Cells. *Molecular Cell*, **72**, 1035-  
494 1049.e5.
- 495 29. Johnson,S.M., Grosshans,H., Shingara,J., Byrom,M., Jarvis,R., Cheng,A.,  
496 Labourier,E., Reinert,K.L., Brown,D. and Slack,F.J. (2005) RAS is regulated by the  
497 let-7 microRNA family. *Cell*, **120**, 635–647.
- 498 30. Courel,M., Clément,Y., Bossevain,C., Foretek,D., Vidal Cruchez,O., Yi,Z., Bénard,M.,  
499 Benassy,M.-N., Kress,M., Vindry,C., *et al.* (2019) GC content shapes mRNA storage  
500 and decay in human cells. *eLife*, **8**.
- 501 31. Fu,J., Dang,Y., Counter,C. and Liu,Y. (2018) Codon usage regulates human KRAS  
502 expression at both transcriptional and translational levels. *Journal of Biological*  
503 *Chemistry*, **293**, 17929–17940.

504 32. Lampson,B.L., Pershing,N.L.K., Prinz,J.A., Lacsina,J.R., Marzluff,W.F., Nicchitta,C.  
505 V., MacAlpine,D.M. and Counter,C.M. (2013) Rare codons regulate KRas  
506 oncogenesis. *Current Biology*, **23**, 70–75.  
507



508 **Figure legends**

509 **Figure 1. MEKi treatments induce potent KRAS and NRAS overexpression in cancer**  
510 **cells.**

511 **A.** Cancer cells were treated 24h with PD184352 (PD18) and trametinib (Tram) at 10 $\mu$ M  
512 and 10nM respectively. LUAD: Lung Adenocarcinoma; SKCM: Skin Cutaneous  
513 Melanoma; BRCA: Breast Cancer. Western blot analysis of the indicated proteins. pERK  
514 and pBRAF represent phosphorylated forms of ERK and BRAF respectively Results are  
515 representative of 3 independent experiments. **B-C.** Quantification of KRAS and NRAS  
516 expression by combining A549 (n=3), MEL501 (n=2), BT549 (n=2), and H1650 (n=1)  
517 biological replicates upon indicated treatments. **D.** A549 cells were transfected with the  
518 indicated siRNAs for 24h followed by 24h of treatment with PD184352 at 10 $\mu$ M (PD18).  
519 **E.** Quantification of BRAF forms in percent of total BRAF protein (n= 3 independent  
520 biological experiments).

521  
522 **Figure 2. KRAS and NRAS overexpression is dependent on increased translation.**

523 **A-B.** A549 cells were treated with PD184352 (PD18) at 10 $\mu$ M and harvested after 24h.  
524 mRNA expression analysis of the indicated genes were analyzed by RT-qPCR using  
525 RPLP0 for normalization and untreated (Ctl) as reference (n=5 independent experiments).  
526 A Mann-Whitney test was performed for statistical analysis. (n.s.: non-significative) **C.**  
527 A549 cells were treated with PD184352 (PD18) at 10 $\mu$ M and Actinomycin D (ActD) at  
528 1 $\mu$ g/mL and harvested at the indicated time. Western blot analysis of the indicated  
529 proteins (n=3 independent experiments). **D.** Polysome profiles (grey) of A549 cells treated  
530 24h with PD184352 (PD18) at 10 $\mu$ M. One representative profile from two independent  
531 experiments is shown. RNA levels (Blue) of indicated transcripts in each polysomal

532 fraction obtained by sucrose-gradient ultracentrifugation was quantified by qRT-PCR.

533 Dotted- line represents baseline.

534

535 **Figure 3. MEKi treatment is associated with a decrease in PB size and number.**

536 **A.** A549 cells were treated 24h with PD184352 (PD18) and trametinib (Tram) at 10 $\mu$ M

537 and 10nM respectively Confocal analysis of PBs using anti-DDX6 antibodies

538 (Inverted/green) with DAPI nuclear staining (blue). Results are representative of 3

539 independent experiments. **B-C** Quantification of indicated PB parameters of previous

540 experiments by FIJI. Results are representative of 3 independent and merged

541 experiments with a minimal quantification of 120 cells in total per conditions. A Mann-

542 Whitney test was performed for statistical analysis. The p-value was indicated as \* $<0.05$ ,

543 \*\* $<0.01$ , \*\*\* $<0.005$ . **D-F.** H1650, MEL501, BT549 cells were treated 24 h with PD184352

544 (PD18) and trametinib (Tram) at 10 $\mu$ M and 10nM respectively. Quantification of indicated

545 PB parameters by FIJI. Results are representative of 3 independent merged experiments

546 with a minimal quantification of 70 cells in total per conditions. A Mann-Whitney test was

547 performed for statistical analysis. The p-value was indicated as \* $<0.05$ , \*\* $<0.01$ , \*\*\* $<0.005$ .

548 **G.H.I** A549 cells were treated with PD184352 (PD18) at 10 $\mu$ M and harvested at the

549 indicated time. **G.H.** Quantification of indicated PB parameters by FIJI. Results are

550 representative of 3 independent merged experiments with a minimal quantification of 220

551 cells in total per conditions. A Mann-Whitney test was performed for statistical analysis.

552 The p-value was indicated as \* $<0.05$ , \*\* $<0.01$ , \*\*\* $<0.005$ . **I.** Western blot analysis at the

553 indicated time. pERK represents a phosphorylated form of ERK. Results are

554 representative of 2 independent experiments.

555

556 **Figure 4. Dynamic regulation of PB formation and MAPK signaling.**

557 A549 cell were treated with PD184352 (PD18) at 10 $\mu$ M. After 24h MEKi was removed,  
558 and cells were harvested at the indicated time. **A.** Scheme of the experiments presented  
559 in panel B-D. **B.** Western blot analysis at the indicated time. pERK and pBRAF represents  
560 phosphorylated form of ERK and BRAF respectively. Results are representative of 2  
561 independent experiments. **C.D.** Quantification by FIJI of PBs number and size  
562 respectively. Results are representative of 2 independent merged experiments with a  
563 minimal quantification of 60 cells in total per conditions. A Mann-Whitney test was  
564 performed for statistical analysis. For all experiments, the P-value was indicated as  
565 \*\*<0.01; \*\*\*<0.005. **E.** Cell counts at indicated time. Results are representative of 2  
566 experiments of 3 independent biological replicates.

567  
568 **Figure 5. Resistant cells maintain a low-PB phenotype overtime.**

569 A549 wild type (WT) cells and 2.5 $\mu$ M PD18 resistant cells (PD18\_R) were treated 24h  
570 with PD184352 (PD18) at 2.5 $\mu$ M or at 10 $\mu$ M. **A.** Western blot analysis at the indicated  
571 time. pERK represents phosphorylated form of ERK. Results are representative of 2  
572 independent experiments. **B.C.** Quantification by FIJI of PBs number and size  
573 respectively. Results are representative of 2 independent merged experiments with a  
574 minimal quantification of 55 cells in total per conditions. A Mann-Whitney test was  
575 performed for statistical analysis. For all experiments, the P-value was indicated as  
576 \*<0.05; \*\*<0.01; \*\*\*<0.005.

577

578 **Figure 6. DDX6 expression controls KRAS and NRAS translation.**

579 **A-E.** Populations of A549 cells either wild type (WT), or overexpressing a green  
580 fluorescent protein (GFP), or a DDX6-GFP fused protein (DDX6). **A.** Western blot analysis  
581 at the indicated time. Results are representative of 2 independent experiments. **B.C.**  
582 Quantification by FIJI of PB number or size respectively. Results are representative of 3  
583 independent merged experiments with a minimal quantification of 160 cells for each  
584 condition. A Mann-Whitney test was performed for statistical analysis. **D.E.** mRNA  
585 expression analysis of the indicated genes was analyzed by RT-qPCR using RPLP0 for  
586 normalization and untreated (WT) as reference. Results represent the combination of 3  
587 independent experiments. A Mann-Whitney test was performed for statistical analysis.  
588 (n.s.: non-significant). For all experiments, the P-value was indicated as \* $<0.05$ ; \*\* $<0.01$ ;  
589 \*\*\* $<0.005$ . **F.G.** A549 cells were transfected with a siControl (siCTL) or with a siDDX6 for  
590 48h. **F.** Western blot analysis at the indicated time. Results are representative of 2  
591 independent experiments. **G.** Quantification by FIJI of PB number. Results are  
592 representative of 3 independent merged experiments with a minimal quantification of 110  
593 cells in total per condition. A Mann-Whitney test was performed for statistical analysis.

594

### 595 **Supplementary Figure 1.**

596 **A.** A549 cells were treated with PD184352 (PD18) at 10 $\mu$ M and Actinomycin D (ActD) at  
597 1 $\mu$ g/mL and harvested at the indicated time. Quantification of Western blot of KRAS (n=3  
598 independent experiments). **B-C.** A549 cells were pretreated with MG132 at 2.5 $\mu$ M and  
599 treated with PD184352 (PD18) at 10 $\mu$ M and harvested at the indicated time. B. Western  
600 blot analysis at the indicated time. pERK represents phosphorylated form of ERK. **C.**  
601 Quantification of western blot.

602

603 **Supplementary Figure 2.**

604 **A.** H1650, **B.** MEL501 and **C.** BT549 cells were treated 24h with PD184352 (PD18) or  
605 trametinib (Tram). **D.E.** A549 cells were treated with PD184352 (PD18) at 10 $\mu$ M and  
606 harvested at indicated time. **A-D.** Confocal analysis of PBs using anti-DDX6 antibodies  
607 (inverted color/green) with DAPI nuclear staining (blue). **E.** Cell cycle distribution was  
608 analyzed by flow cytometry. Results represent the merge of 3 independent experiments.

609

610 **Supplementary Figure 3.**

611 A549 cells were treated 24h with PD184352 (PD18) at 10 $\mu$ M and 20min with Sodium  
612 Arsenite (NaAsO<sub>2</sub>) at 0.5mM. Confocal analysis of PBs using anti-DDX6 (Inverted/green)  
613 and stress granule anti-G3BP1 (Inverted/red) antibodies respectively with DAPI nuclear  
614 staining (blue).

615

616 **Supplementary Figure 4.**

617 A549 cells were treated with PD184352 (PD18) at 10 $\mu$ M, after 24h MEKi was removed,  
618 and cells were harvested at the indicated time. **A-B.** Western blot quantification of KRAS,  
619 NRAS, and pERK at the indicated time, Results represent the merge of 2 independent  
620 experiments. **C.** Confocal analysis of PBs using anti-DDX6 (Inverted/green) antibodies  
621 with DAPI nuclear staining (blue).

622

623 **Supplementary Figure 5.**

624 **A.** A549 wild type (WT) cells and 2.5 $\mu$ M PD18 resistant cells (PD18\_R) were treated 24h  
625 with PD184352 (PD18) at indicated concentrations. Confocal analysis of PBs using anti-  
626 DDX6 (Inverted/green) and LSM14A (Inverted/Red) antibodies with DAPI nuclear staining

627 (blue). **B.** Western blot quantification of KRAS and NRAS at the indicated time, Results  
628 represent the merge of 2 independent experiments **C.** Resistant cells (PD18\_R) were  
629 cultured in the absence or presence of PD184352 (2.5 $\mu$ M) and counted at indicated time.  
630 Results are representative of 2 independent biological triplicates.

631  
632 **Supplementary Figure 6.**  
633 **A-B.** A549 wild type (WT) cells, overexpressing a green fluorescent protein (GFP) and a  
634 DDX6-GFP fused protein (DDX6). **A.** Western blot quantification of KRAS and NRAS at  
635 the indicated time, Results represent the merge of 2 independent experiments. **B.**  
636 Confocal analysis of PBs using anti-LSM14 (Inverted/green) antibodies with DAPI nuclear  
637 staining (blue). **C-E.** A549 cells were transfected with a siControl (siCTL) or with a siDDX6  
638 for 48h. **C-D.** Western blot quantification of KRAS and NRAS at the indicated time. Results  
639 represent the merge of 2 independent experiments. **E.** Confocal analysis of PBs using  
640 anti-LSM14 (Inverted/green) antibodies with DAPI nuclear staining (blue).

641  
642 **Supplementary Figure 7.**  
643 Negative feedback loop under ERK1/2 phosphorylation is associated with formation of  
644 Processing bodies (PBs). PBs control *KRAS* and *NRAS* mRNA translation. PB dissolution  
645 under MEKi treatment is associated with enhanced *KRAS* and *NRAS* mRNA translation

646  
647  
648  
649  
650

651 **Supplementary Table**

652 **List of reagents**

| <b><u>REAGENT or RESOURCE</u></b>                           | <b><u>SOURCE</u></b>        | <b><u>IDENTIFIER</u></b> |
|-------------------------------------------------------------|-----------------------------|--------------------------|
| <b><u>Antibodies</u></b>                                    |                             |                          |
| AlexaFluor 488 chicken anti-Rabbit IgG                      | Invitrogen                  | A21441                   |
| AlexaFluor 594 chicken anti-Rabbit IgG                      | Invitrogen                  | A21442                   |
| Anti-mouse IgG (HRP conjugate)                              | Promega                     | W402-B                   |
| Anti-rabbit (HRP conjugate)                                 | Promega                     | W401-B                   |
| Anti-tubulin                                                | Sigma                       | T9026                    |
| BRAF (55C6)                                                 | Cell Signaling Technology   | 9433S                    |
| DDX6                                                        | Bethyl                      | A300-460A                |
| G3BP1                                                       | Santa cruz biotechnology    | sc-365338                |
| GAPDH                                                       | Cell Signaling Technology   | 2118L                    |
| KRAS                                                        | Novus                       | H00003845                |
| LSM14A                                                      | Bethyl                      | A305-102A-M              |
| NRAS (F155)                                                 | Santa Cruz biotechnology    | sc-31                    |
| p44/42 MAPK (ERK1/2)                                        | Cell Signaling Technology   | 9102S                    |
| P-p44/42 MAPK (pERK)                                        | Cell Signaling Technology   | 9101S                    |
| <b><u>Chemicals, Peptides, and Recombinant Proteins</u></b> |                             |                          |
| DC™ Protein Assay Kit                                       | BioRad                      | 5000111                  |
| Direct-zol RNA MiniPrep Plus                                | ZymoResearch                | R2072                    |
| Fast SYBR-Green Master Mix                                  | Applied Biosystems          | 4385612                  |
| High-Capacity cDNA Reverse Transcription Kit                | Applied Biosystems          | 4368814                  |
| Paraformaldehyde 32% solution EM grade                      | Electron Microscopy Science | 15714                    |
| Prolong Diamond Antifade Mountant with DAPI                 | Invitrogen                  | P36962                   |
| Protein ladder                                              | Euromedex                   | 06P-0111                 |
| RNase OUT                                                   | Invitrogen                  | 10777-019                |
| TaqMan™ Fast Advanced Master Mix                            | Applied Biosystems          | 4444965                  |
| TaqMan™ MicroRNA Reverse Transcription Kit                  | Applied Biosystems          | 4366597                  |
| TRI Reagent®                                                | Molecular Research Center   | TR 118                   |
| <b><u>Cell culture and treatments</u></b>                   |                             |                          |
| Puromycin Dihydrochloride                                   | Invitrogen                  | A1113803                 |
| 0,05% trypsin-EDTA (1X)                                     | Gibco                       | 25300-054                |
| Actinomycin D                                               | Gibco                       | 11805-017                |
| Amicon Ultra-15, PLHK, 100 kD                               | Sigma-aldrich/Merck         | UFC9100024               |
| DDX6 silencer select                                        | Ambion                      | 4392420 (id : s4010)     |
| Dimethyl-sulfoxide                                          | Sigma-aldrich/Merck         | 276855-100mL             |
| DMEM (1X) + Glutamax-l                                      | Gibco                       | 31966-021                |
| Jet Prime transfection reagent                              | Polyplus                    | 114-15                   |
| KRAS silencer select-validated                              | Ambion                      | 4390824 (id : s7940)     |

|                                            |                         |                       |
|--------------------------------------------|-------------------------|-----------------------|
| Lipofectamine 3000                         | Invitrogen              | L3000-008             |
| LSM14A silencer select                     | Ambion                  | 4392420 (id : s25051) |
| MEM NEAA                                   | Gibco                   | 11140-35              |
| MG132                                      | Tocris                  | 1748                  |
| Negative Control siRNA #1 Silencer Select  | Ambion                  | 4390843               |
| NRAS silencer select-validated             | Ambion                  | 4390824 (id : s55)    |
| PD184352                                   | Sigma-aldrich/Merck     | P30181-5mg            |
| Polybrene Infection / Transfection Reagent | Sigma-aldrich/Merck     | TR-1003-G             |
| RPMI Medium 1640 (1X) + Glutamax-I         | Gibco                   | 61870-010             |
| Sodium Arsenite Solution                   | Supelco                 | 106277                |
| Trametinib                                 | TargetMOI               | TA-T2125-5mg          |
| <b><u>Oligonucleotides</u></b>             |                         |                       |
| KRAS-Forward                               | GACTGGGGAGGGCTTTCTTT    |                       |
| KRAS-Reverse                               | GCATCATCAACACCCTGTCT    |                       |
| NRAS-Forward                               | CCAATACATGAGGACAGGCGA   |                       |
| NRAS-Reverse                               | TCACACTTGTTCCTCCACTAGCA |                       |
| RPLP0-Forward                              | GCATCAGTACCCCATTCTATCAT |                       |
| RPLP0-Reverse                              | AGGTGTAATCCGTCTCCACAGA  |                       |
| <b><u>Recombinant DNA</u></b>              |                         |                       |
| pEGFP-C1_p54cp                             | Gift                    |                       |
| pPRIPu-CrUCCI                              | Gift                    |                       |
| <b><u>Software and Algorithms</u></b>      |                         |                       |
| CytExpert 2.3                              |                         |                       |
| FIJI 1.53j                                 |                         |                       |
| Prism 8.0.2                                |                         |                       |
| StepOne Software v2.3                      |                         |                       |



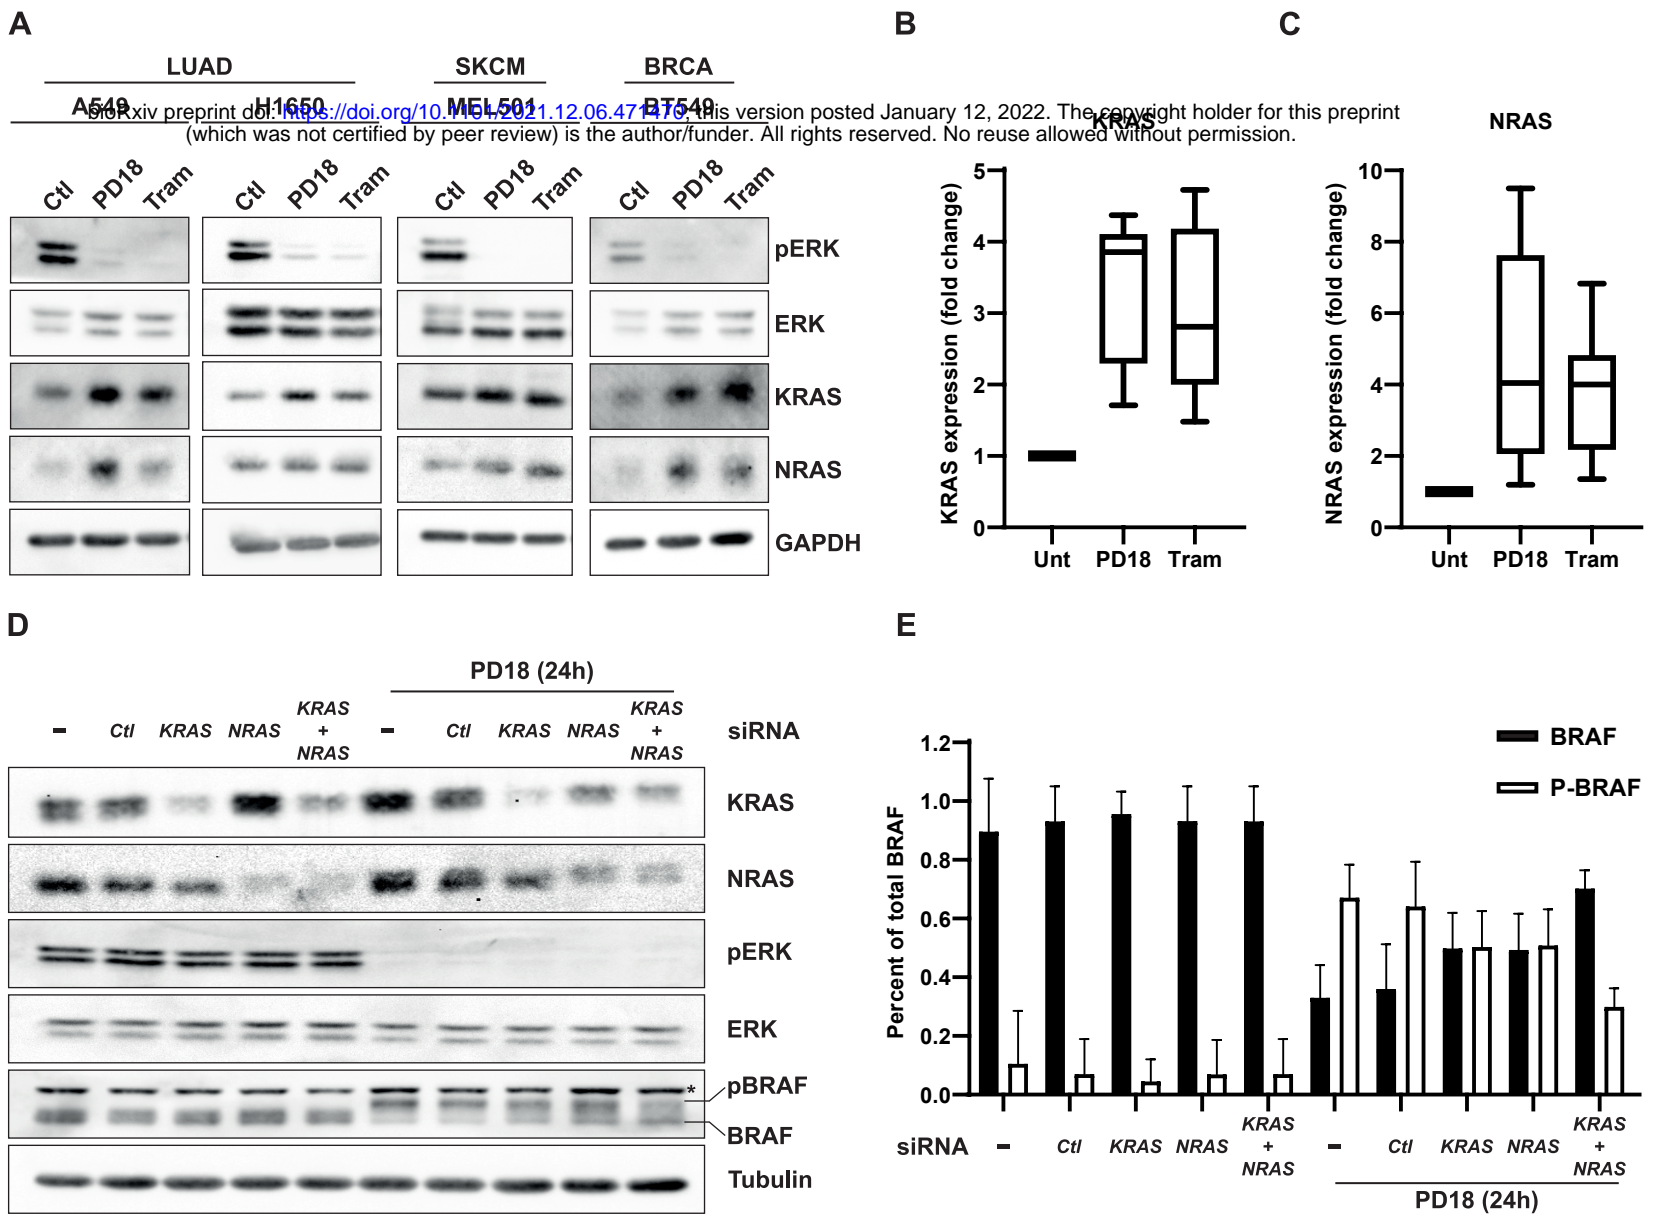

**Figure 1**

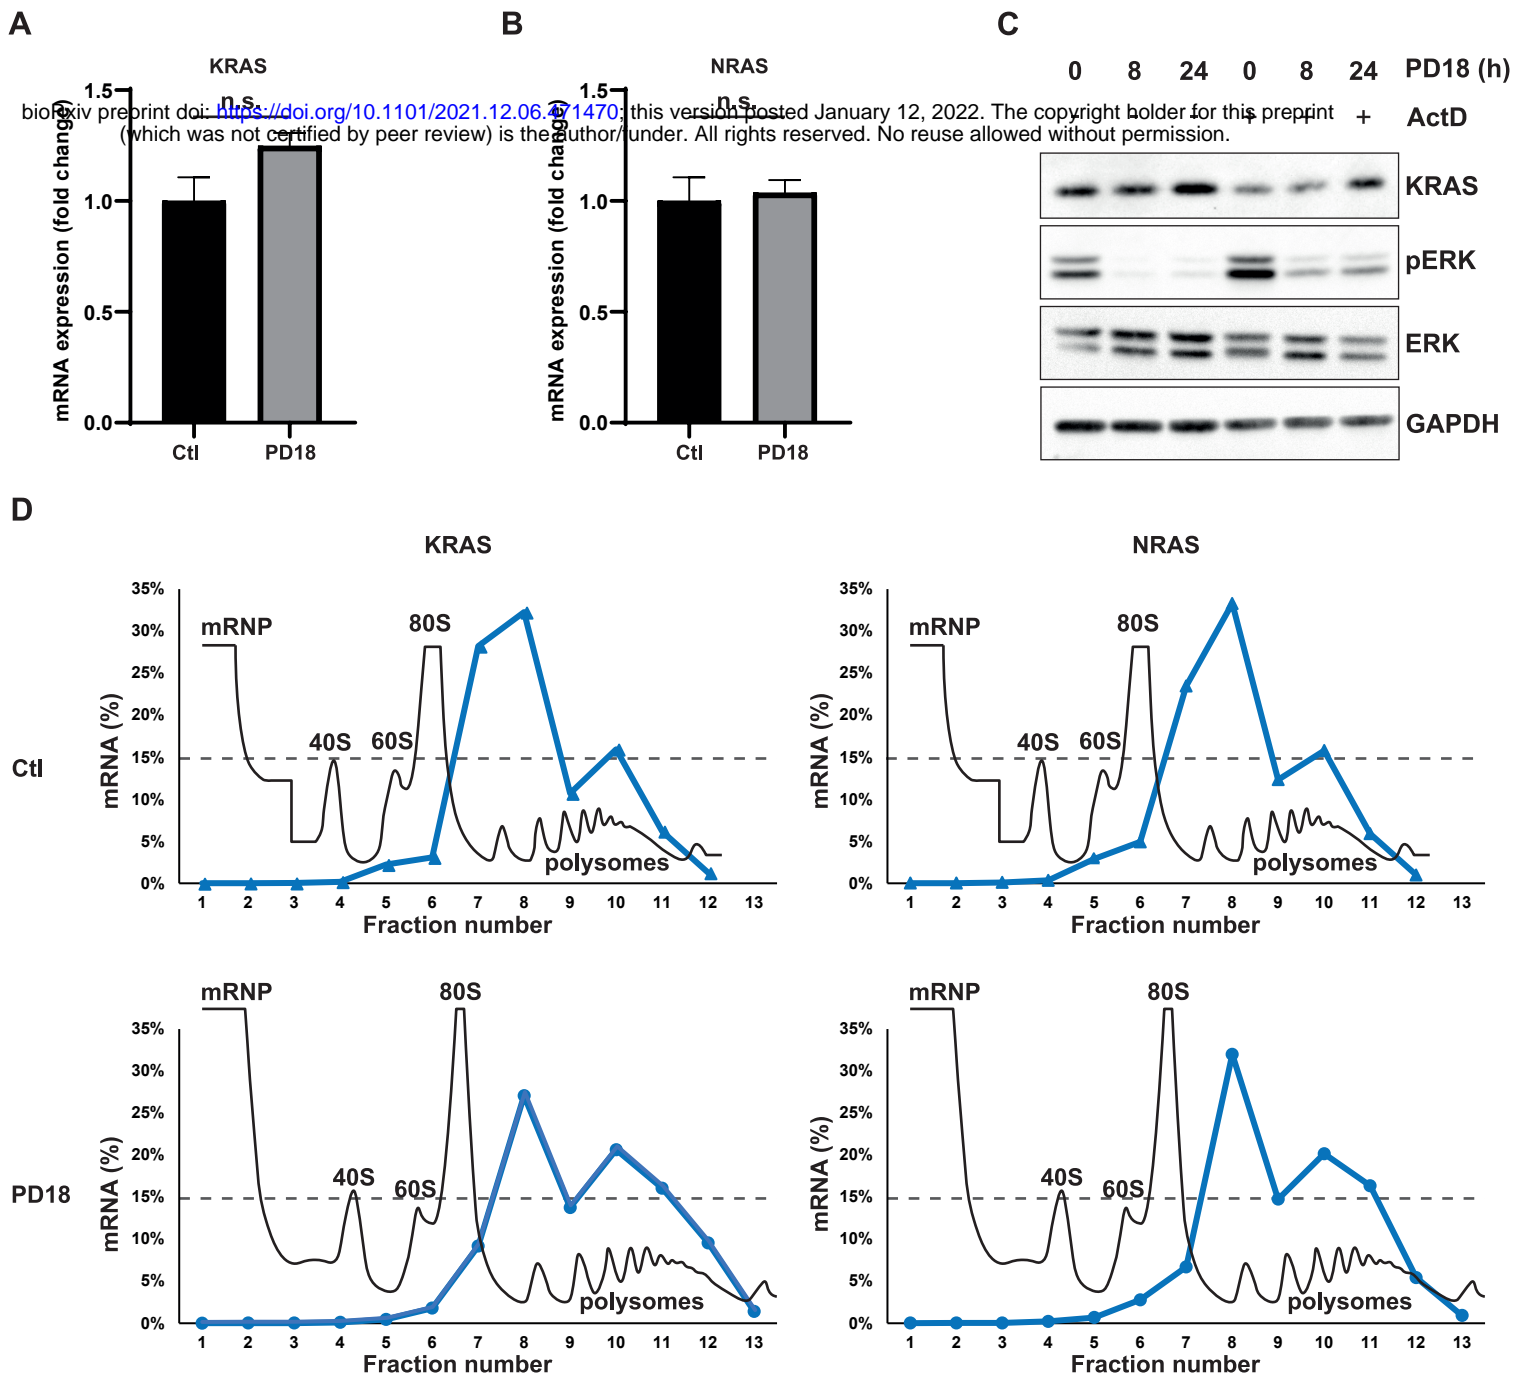

**Figure 2**

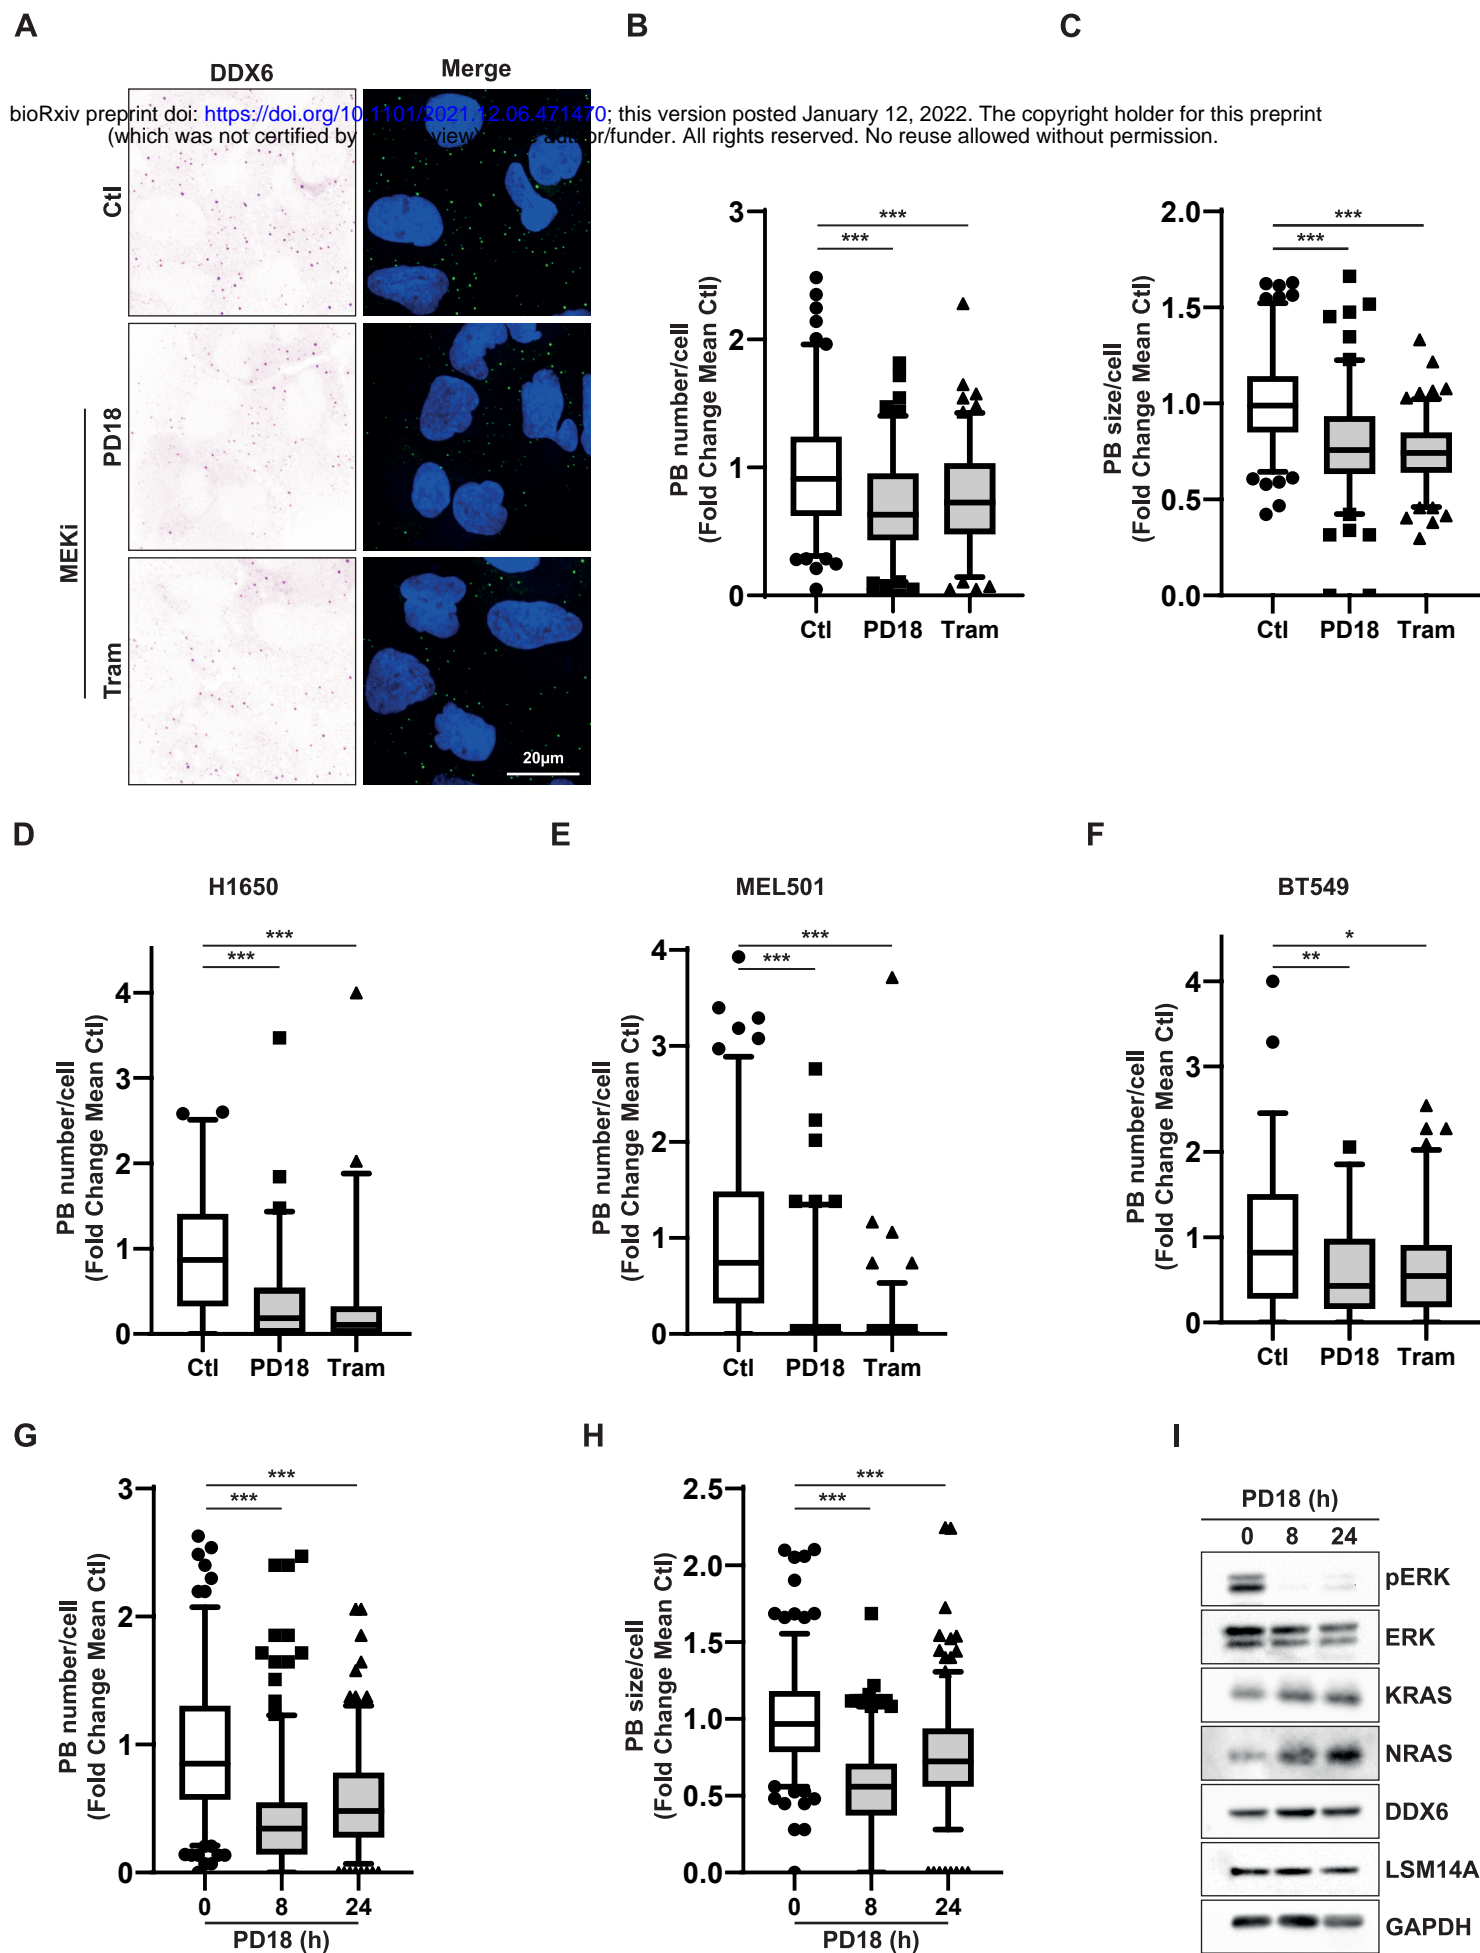

**Figure 3**

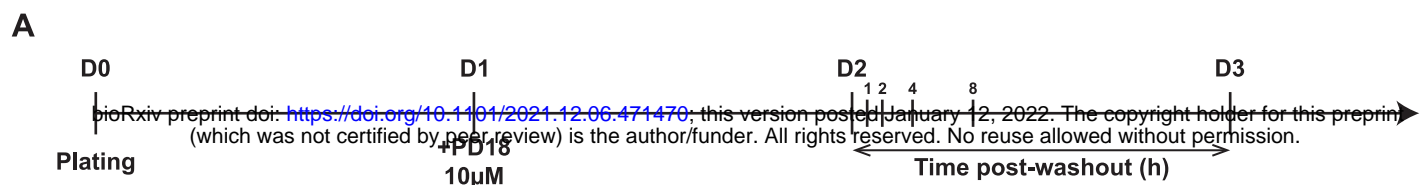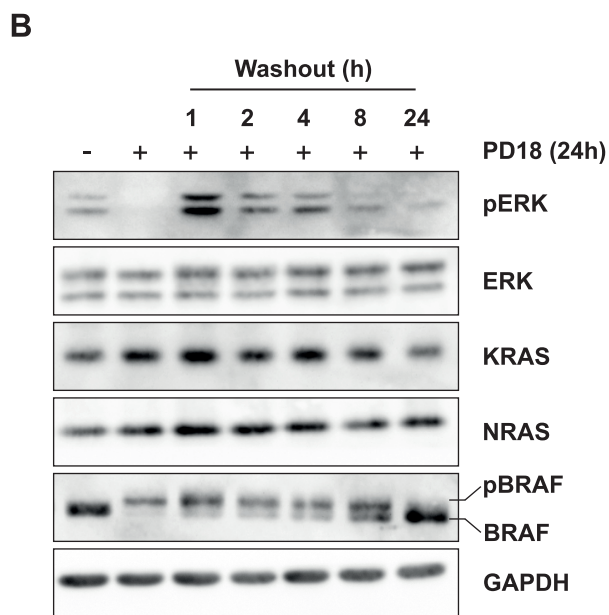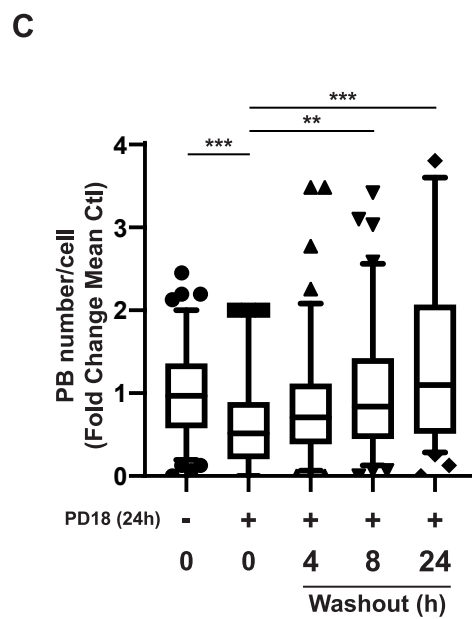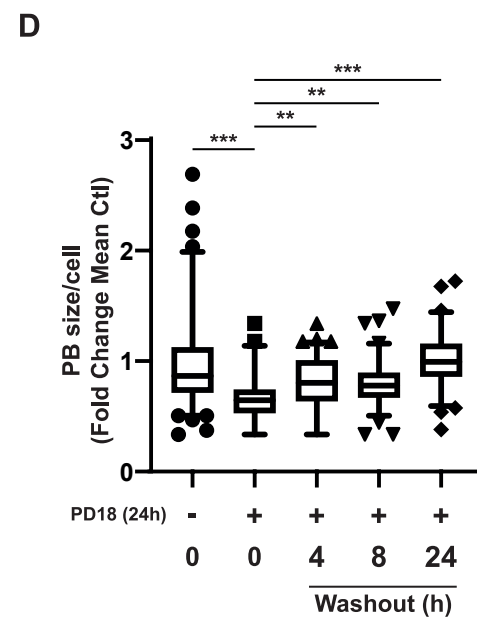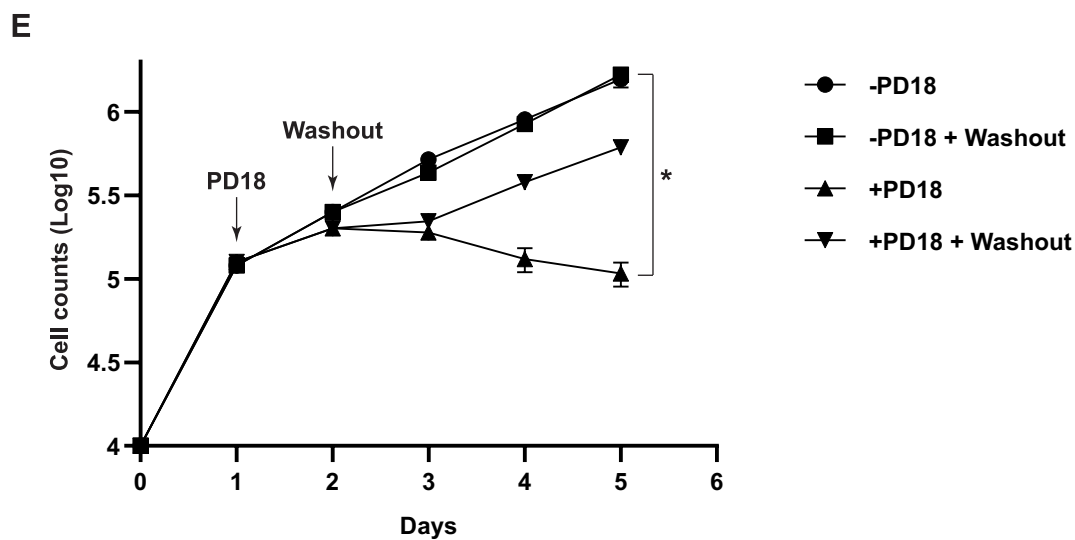

**Figure 4**

A

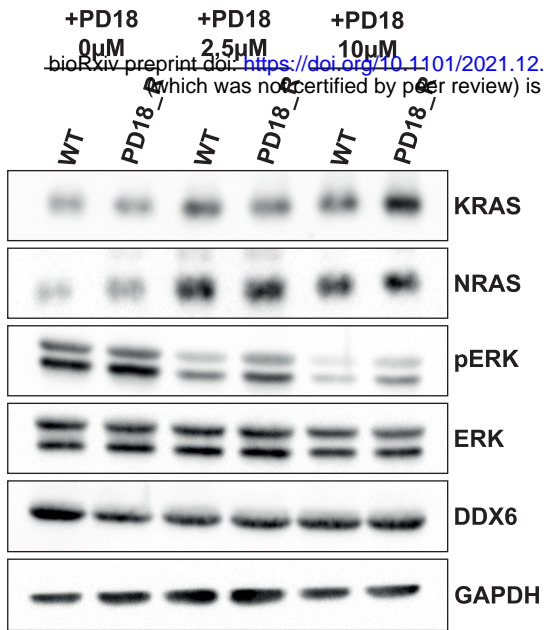

B

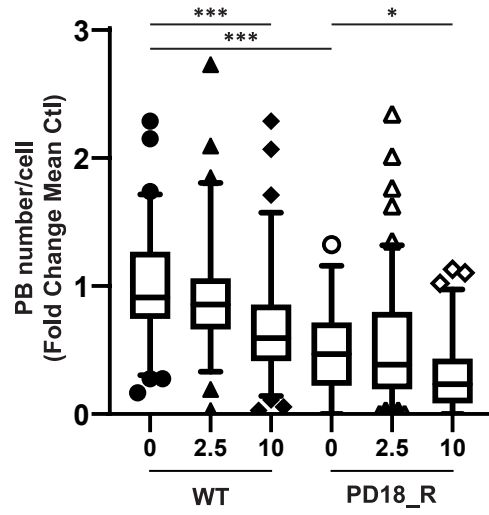

C

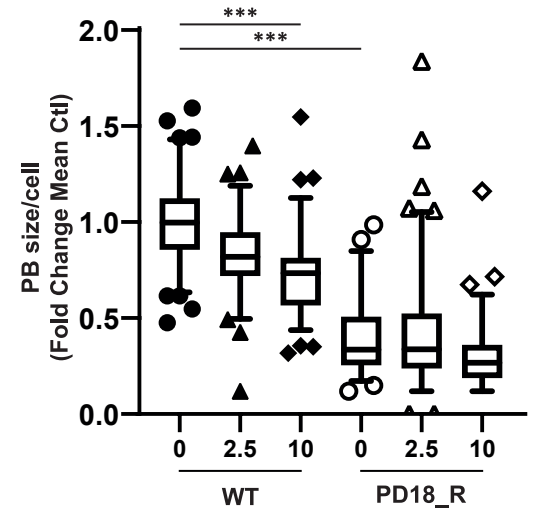

Figure 5

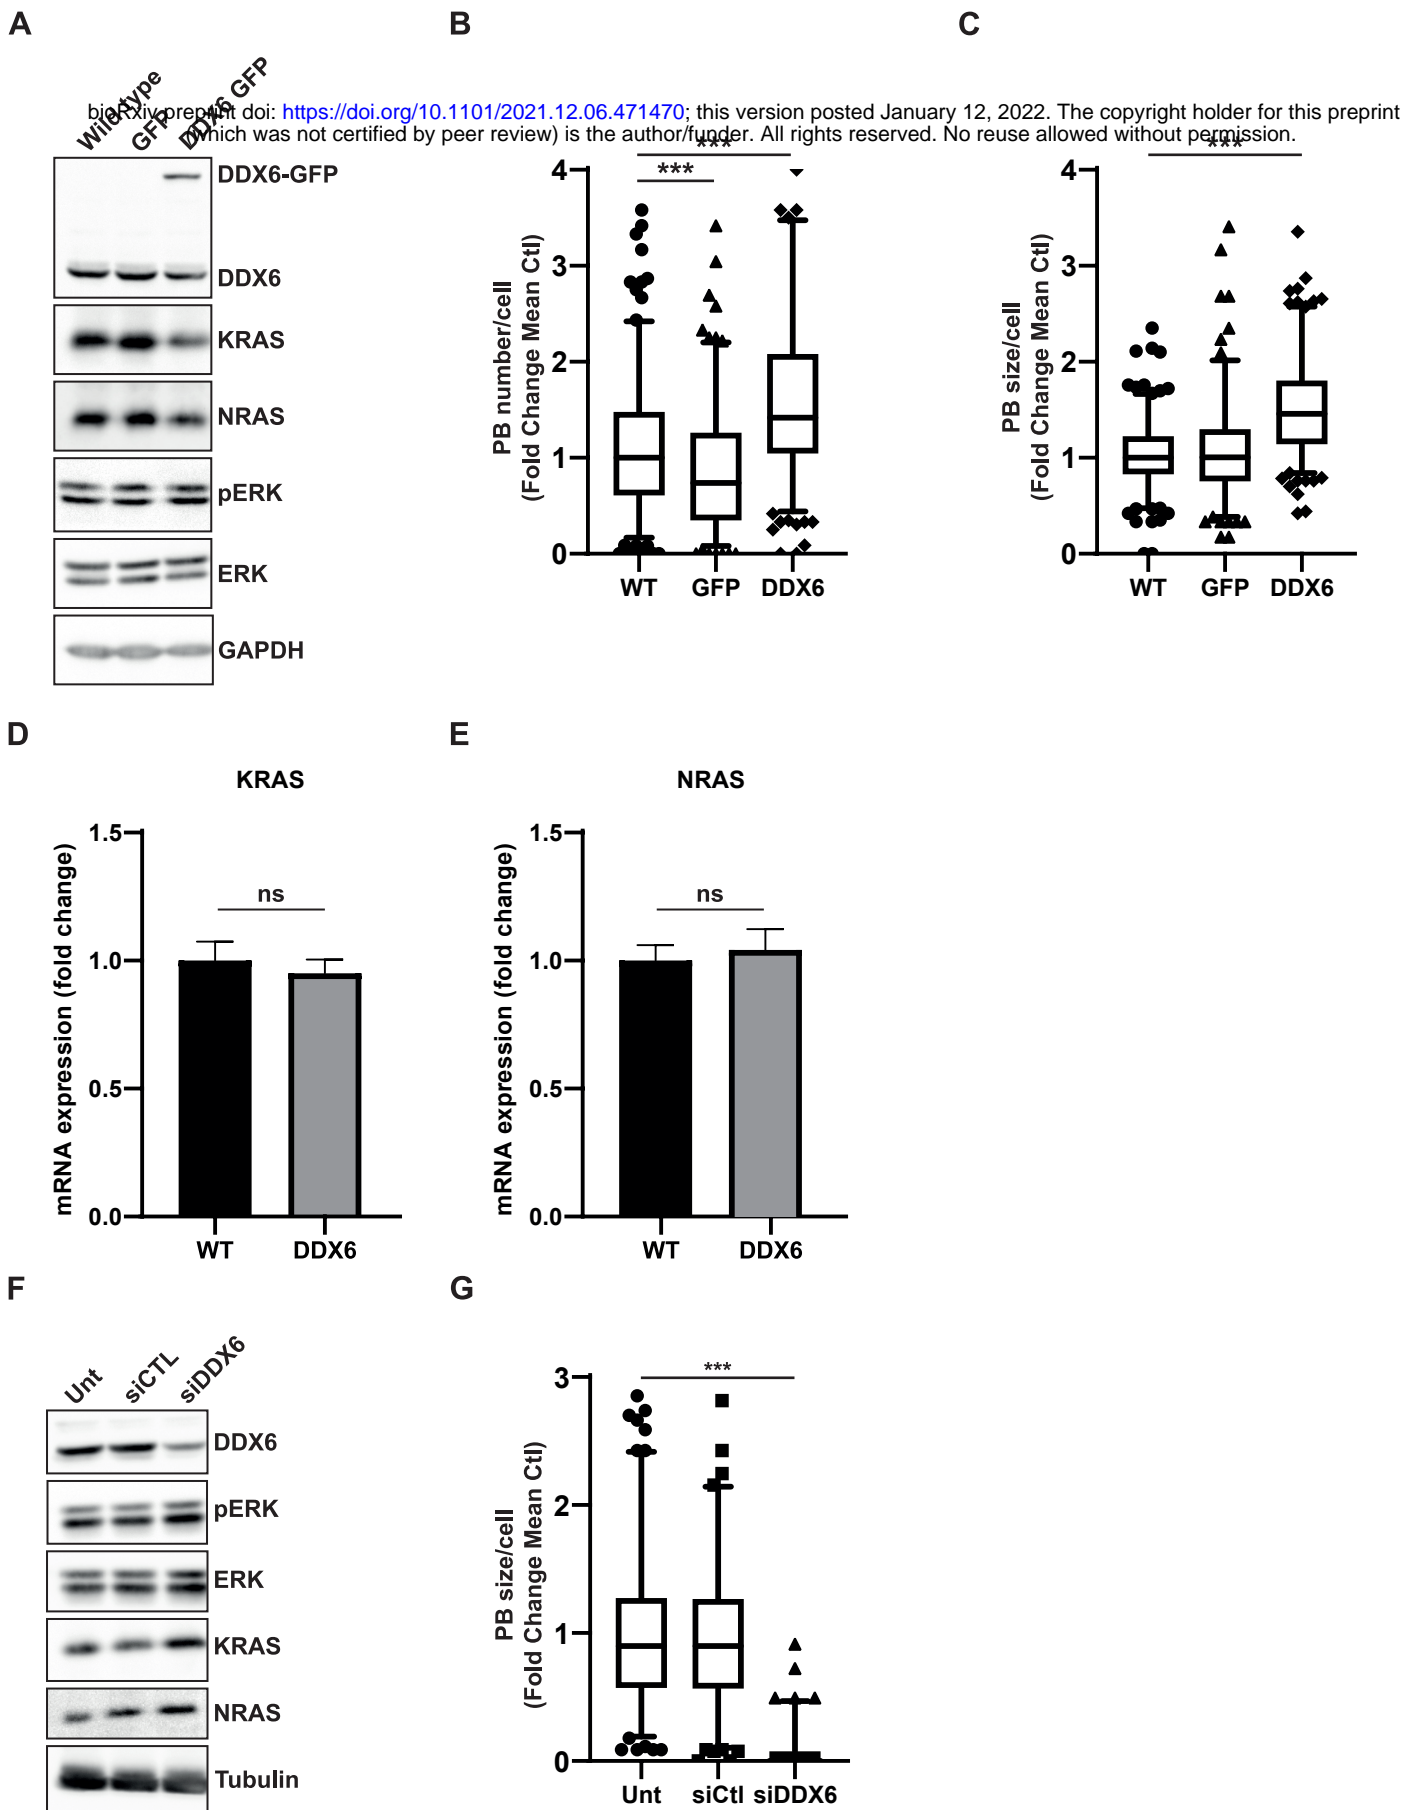

**Figure 6**
